# Supplementary material
Source: Springer Nature journal article supplement (https://www.springermedizin.de/resource/supplementary/12950_2011_238_MOESM1_ESM.pdf/9558278)

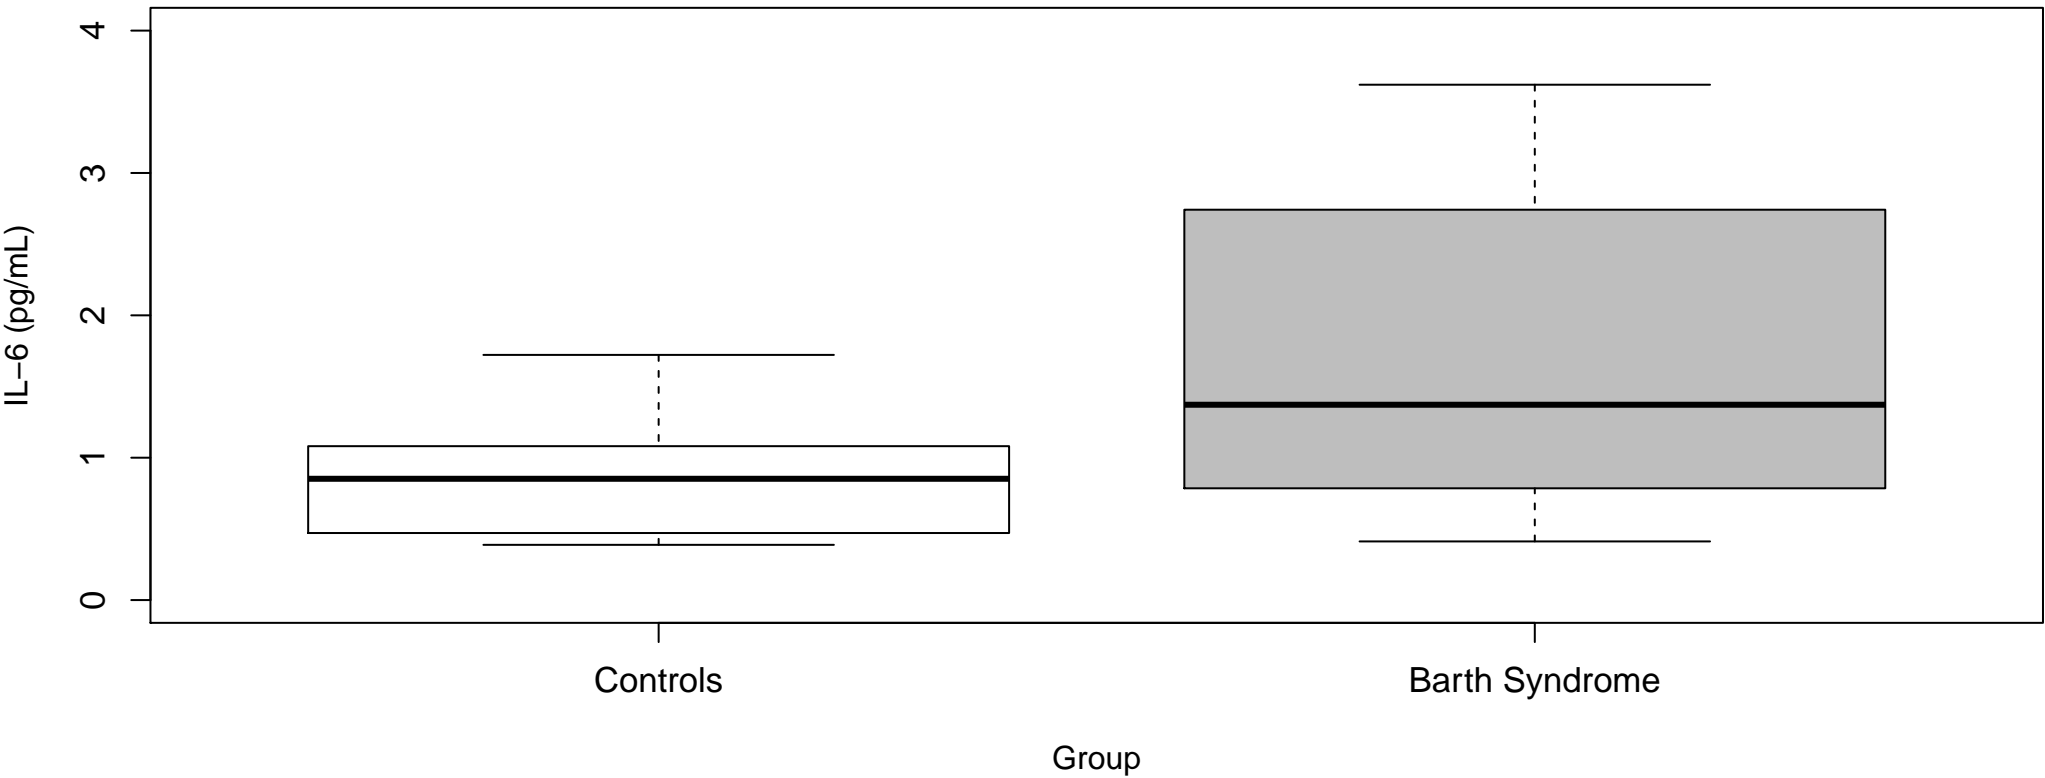

Supplement: MOESM1 [file 9558278]
